# Supplementary material
Source: HighWire-hosted journal article supplement (https://fg.bmj.com/content/flgastro-2019-101216)
Supplement: inline-supplementary-material-4 [file inline-supplementary-material-4.pdf]

## Appendix 4: Follow –up clinic proforma

|                                                                                                                           |  |                                                                          |                     |            |                            |
|---------------------------------------------------------------------------------------------------------------------------|--|--------------------------------------------------------------------------|---------------------|------------|----------------------------|
| <b>LIVER TRANSPLANT CLINIC</b>                                                                                            |  | Name:                                                                    |                     |            |                            |
|                                                                                                                           |  | Address:                                                                 |                     |            |                            |
|                                                                                                                           |  | DOB:                                                                     |                     |            |                            |
|                                                                                                                           |  | NHS:                                                                     |                     |            |                            |
| <b>Transplant:</b><br>Date:<br>Centre:<br>Indication:                                                                     |  | Biliary anastomosis:<br>Immunosuppression History:<br>Rejection history: |                     |            |                            |
| <b>Co-morbidity:</b><br>Diabetes Mellitus (PTDM)<br>Hypertension<br>Obesity<br>Smoker                                     |  | <b>Current Medication:</b>                                               |                     |            |                            |
| <b>Current complaints:</b>                                                                                                |  | <b>Smoker?</b>                                                           |                     |            |                            |
|                                                                                                                           |  | <b>Alcohol?</b>                                                          |                     |            |                            |
| <b>Examination:</b><br>BP:                      mmHg<br>Weight:                Kg                      BMI:<br>Urine dip: |  | Bil                                                                      | umol/L              | eGR        | mls/min/1.73m <sup>2</sup> |
|                                                                                                                           |  | ALT                                                                      | u/L                 | Urea       | mmol/L                     |
|                                                                                                                           |  | ALP                                                                      | u/L                 | Creatinine | umol/L                     |
|                                                                                                                           |  | Alb                                                                      | g/L                 | Na+        | mmol/L                     |
|                                                                                                                           |  | Glucose                                                                  | mmol/L              | K+         | mmol/L                     |
|                                                                                                                           |  | Hb                                                                       | g/L                 | Urate      | umol/L                     |
|                                                                                                                           |  | WBC                                                                      | x10 <sup>9</sup> /L | Neutrophil | x10 <sup>9</sup> /L        |
|                                                                                                                           |  | Platelet                                                                 | x10 <sup>9</sup> /L | PT         | s                          |
|                                                                                                                           |  | Tacrolimus                                                               | ug/L                | Neoral     | ug/L                       |
| <b>Notes:</b>                                                                                                             |  |                                                                          |                     |            |                            |
|                                                                                                                           |  |                                                                          |                     |            |                            |
